# Supplementary material
Source: PubMed Central journal article supplement (PMC7234919)
Supplement: NIHMS1575810-supplement-Supplement.pdf [file NIHMS1575810-supplement-Supplement.pdf]

\*\*\*\*\*  
**SUPPLEMENTAL DATA S1**  
**LONELINESS AND END OF LIFE EXPERIENCE IN OLDER ADULTS**  
\*\*\*\*\*

**TABLE OF CONTENTS**

| <b>TOPIC</b>                                                                                                                                                | <b>PAGE</b> |
|-------------------------------------------------------------------------------------------------------------------------------------------------------------|-------------|
| <b>MULTIVARIABLE REGRESSION MODELS PREDICTING TOTAL SYMPTOM BURDEN IN THE LAST YEAR OF LIFE IN LONELY AND NON-LONELY DECEDENTS WITH MULTIPLE IMPUTATION</b> |             |
| Supplemental Table 1                                                                                                                                        | 2           |
| <b>SENSITIVITY ANALYSES WITHOUT MULTIPLE IMPUTATION</b>                                                                                                     |             |
| Supplemental Table 2                                                                                                                                        | 3           |
| Supplemental Table 3                                                                                                                                        | 4           |

**Supplemental Table 1: Multivariable regression models predicting total symptom burden<sup>a</sup> in the last year of life in lonely versus non-lonely decedents with imputed covariates (n=2896)**

|                                   | Unadjusted          |                  | Model 1 <sup>b</sup> |                  | Model 2 <sup>c</sup> |              | Model 3 <sup>d</sup> |                  | Model 4 <sup>e</sup> |                  | Model 5 <sup>f</sup> (n=2452) |              |
|-----------------------------------|---------------------|------------------|----------------------|------------------|----------------------|--------------|----------------------|------------------|----------------------|------------------|-------------------------------|--------------|
|                                   | Beta<br>(95% CI)    | P-Value          | Beta<br>(95% CI)     | P-Value          | Beta<br>(95% CI)     | P-Value      | Beta<br>(95% CI)     | P-Value          | Beta<br>(95% CI)     | P-Value          | Beta<br>(95% CI)              | P-Value      |
| Total symptom burden <sup>a</sup> | 0.26<br>(0.19-0.34) | <b>&lt;0.001</b> | 0.19<br>(0.12-0.26)  | <b>&lt;0.001</b> | 0.11<br>(0.03-0.19)  | <b>0.006</b> | 0.19<br>(0.12-0.27)  | <b>&lt;0.001</b> | 0.21<br>(0.13-0.28)  | <b>&lt;0.001</b> | 0.13<br>(0.04-.21)            | <b>0.004</b> |

Note: Bold font indicates statistically significant value (P<0.05)

<sup>a</sup> Composite score for total symptom burden derived from factor analysis, Cronbach's alpha = 0.65.

<sup>b</sup> Model 1: Adjusted for race, age, gender, education, total income, multimorbidity-weighted index

<sup>c</sup> Model 2: Model 1 + depressive symptoms

<sup>d</sup> Model 3: Model 1 + family and friends (partner status and "has friends;" note that "has children," "lives within 10 miles of children" and "has other immediate family" were not included since the baseline relationship with loneliness was not significant [Table 1])

<sup>e</sup> Model 4: Model 1 + social support (relies on spouse, relies on children, relies on friends)

<sup>f</sup> Model 5: Model 2 + family and friends (partner status, has friends) + social support (relies on spouse, relies on children, relies on friends)

**Supplemental Table 2: Multivariable regression models predicting total symptom burden in the last year of life in lonely versus non-lonely decedents without imputed covariates**

|                                   | Unadjusted (n=2896) |                  | Model 1 <sup>b</sup> (n=2877) |                  | Model 2 <sup>c</sup> (n= n=2695) |             | Model 3 <sup>d</sup> (n=2772) |                  | Model 4 <sup>e</sup> (n=2670) |                  | Model 5 <sup>f</sup> (n=2452) |             |
|-----------------------------------|---------------------|------------------|-------------------------------|------------------|----------------------------------|-------------|-------------------------------|------------------|-------------------------------|------------------|-------------------------------|-------------|
|                                   | Beta<br>(95% CI)    | P-Value          | Beta<br>(95% CI)              | P-Value          | Beta<br>(95% CI)                 | P-Value     | Beta<br>(95% CI)              | P-Value          | Beta<br>(95% CI)              | P-Value          | Beta<br>(95% CI)              | P-Value     |
| Total symptom Burden <sup>a</sup> | 0.26<br>(0.18-0.34) | <b>&lt;0.001</b> | 0.19<br>(0.12-0.27)           | <b>&lt;0.001</b> | 0.10<br>(0.02-0.18)              | <b>0.02</b> | 0.19<br>(0.11-0.27)           | <b>&lt;0.001</b> | 0.22<br>(0.14-0.31)           | <b>&lt;0.001</b> | 0.12<br>(0.02-0.22)           | <b>0.02</b> |

Note: Bold font indicates statistically significant value (P<0.05)

<sup>a</sup> Composite score for total symptom burden derived from factor analysis, Cronbach's alpha = 0.65.

<sup>b</sup> Model 1: Adjusted for race, age, gender, education, total income, multimorbidity weighted index

<sup>c</sup> Model 2: Model 1 + depressive symptoms

<sup>d</sup> Model 3: Model 1 + family and friends (partner status and "has friends;" note that "has children," "lives within 10 miles of children" and "has other immediate family" were not included since the baseline relationship with loneliness was not significant [Table 1])

<sup>e</sup> Model 4: Model 1 + social support (relies on spouse, relies on children, relies on friends)

<sup>f</sup> Model 5: Model 2 + family and friends (partner status, has friends) + social support (relies on spouse, relies on children, relies on friends)

**Supplemental Table 3: Relationship of loneliness to measures of intense care, healthcare utilization, and advance care planning at end of life without imputed covariates**

| Outcome                                                         | Adjusted <sup>b</sup> Odds Ratio<br>(95% CI) | P-Value     |
|-----------------------------------------------------------------|----------------------------------------------|-------------|
| <b>Measures of Intense EOL Care</b>                             |                                              |             |
| 3 or less days in hospice<br>(n=1139)                           | 0.90 (0.69-1.10)                             | 0.43        |
| Death location (n=2481)                                         |                                              |             |
| Home                                                            | Ref                                          | Ref         |
| Hospital                                                        | 1.16 (0.89-1.51)                             | 0.24        |
| Nursing home                                                    | 1.50 (1.03-2.19)                             | <b>0.03</b> |
| Spent time in ICU in last 2 years<br>of life (n=904)            | 1.08 (0.84-1.40)                             | 0.53        |
| Used life support equipment in<br>last 2 years of life (n=1949) | 1.38 (1.06-1.79)                             | <b>0.02</b> |
| Dialysis in last 2 years of life<br>(n=1968)                    | 0.74 (0.41-1.31)                             | 0.30        |
| <b>Other Healthcare Utilization in Last 2 years of Life</b>     |                                              |             |
| Hospital nights, IRR <sup>a</sup> (n=1740)                      | 0.96 (0.68-1.36)                             | 0.82        |
| Nursing home nights, IRR<br>(n=365)                             | 0.78 (0.42-1.45)                             | 0.41        |
| <b>Advance Care Planning</b>                                    |                                              |             |
| Discussed EOL care (n=2460)                                     | 1.06 (0.83-1.34)                             | 0.63        |
| Assigned durable power of<br>attorney (n=2417)                  | 1.09 (0.82-1.44)                             | 0.54        |
| Written EOL care instructions<br>(n=2440)                       | 0.97 (0.78-1.21)                             | 0.79        |
| Subject participated in EOL<br>decisions (n=1051)               | 0.91 (0.64-1.30)                             | 0.65        |

Note: Bold font indicates statistically significant value (P<0.05)

<sup>a</sup> IRR: Incidence risk ratio

<sup>b</sup> Adjusted for race, age, gender, education, total income, multimorbidity-weighted index, depressive symptoms, family and friends (partner status, has friends), social support (relies on spouse, relies on children, relies on friends)
